# Supplementary material
Source: PubMed Central journal article supplement (PMC5672056)
Supplement: 10.1074_M117.801795_jbc.M117.801795-1.pdf [file 10.1074_M117.801795_jbc.M117.801795-1.pdf]

**Matriptase-2 Suppresses Heparin Expression by Cleaving Multiple Components of the Heparin Induction Pathway**

Mastura Wahedi, Aaron W. Wortham, Mark D. Kleven, Ningning Zhao, Shall Jue, Caroline A. Enns, and An-Sheng Zhang

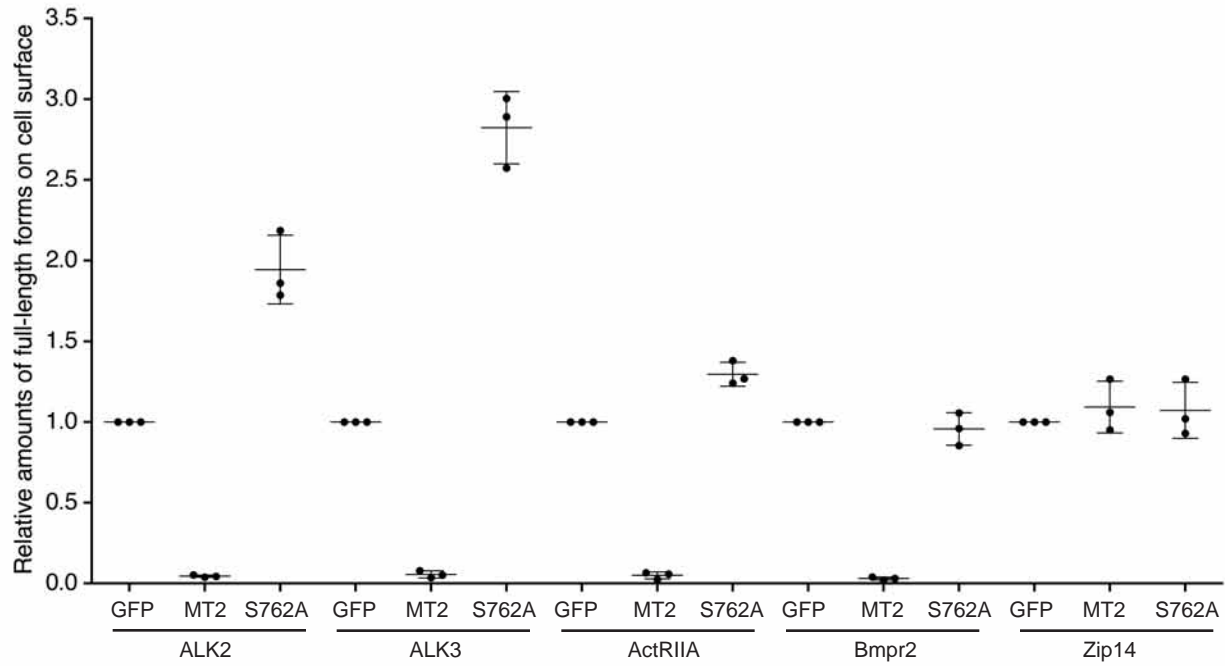

**Supplemental Figure 1.** Quantification for the full-length forms of biotinylated cell surface ALK2, ALK3, ActRIIA, Bmpr2, and Zip14 in western blot images of Fig. 6C, 6E, 7B, 7D, and 7F, respectively, from three independent biological replicates for each by using ImageJ software. For the convenience of analysis, the band intensities of ALK2, ALK3, ActRIIA, Bmpr2, and Zip14 with co-transfection of EGFP (GFP) were arbitrarily set to 1. The relative levels with co-transfection of MT2 and S762A-MT2 (S762A) were presented.

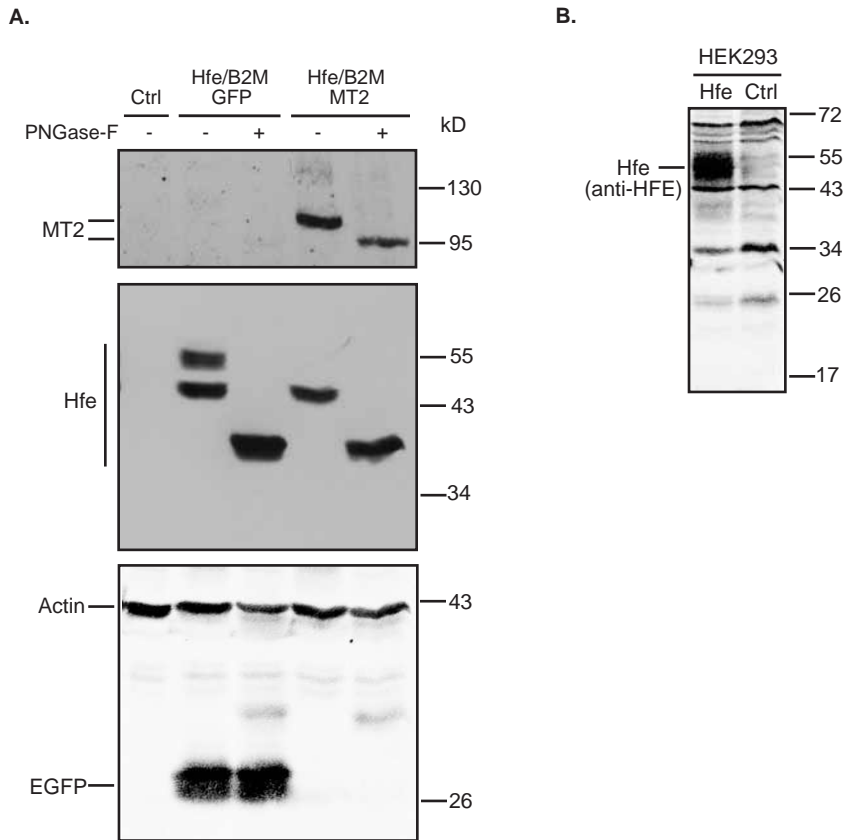

**Supplemental Figure 2.** *PNGase F* sensitivity of cellular *Hfe*, and immunodetection of *Hfe* by a rabbit anti-HFE antibody. **A)** *PNGase F* sensitivity of cellular *Hfe*. Cell lysate from HEK293 cells cotransfected with *Hfe/B2M* and *GFP* or *MT2* were subjected to *PNGase F* digestion. Immunoblots were performed using anti-FLAG antibody for *MT2* and *Hfe*, anti-beta-actin, and anti-GFP antibody. **B)** Immunodetection of *Hfe* by a rabbit anti-HFE antibody. HEK293 cells in 12-well plate were transfected with pCMV6-*Hfe/B2M* (*Hfe*) or pcDNA3 (*Ctrl*). After 48 hr of transfection, cell lysates were collected for immunodetection of *Hfe* by using a rabbit anti-HFE antibody (ab176123; Abcam). All experiments were repeated at three times (technical replicate = 1; independent biological replicates = 3) with consistent results.

A

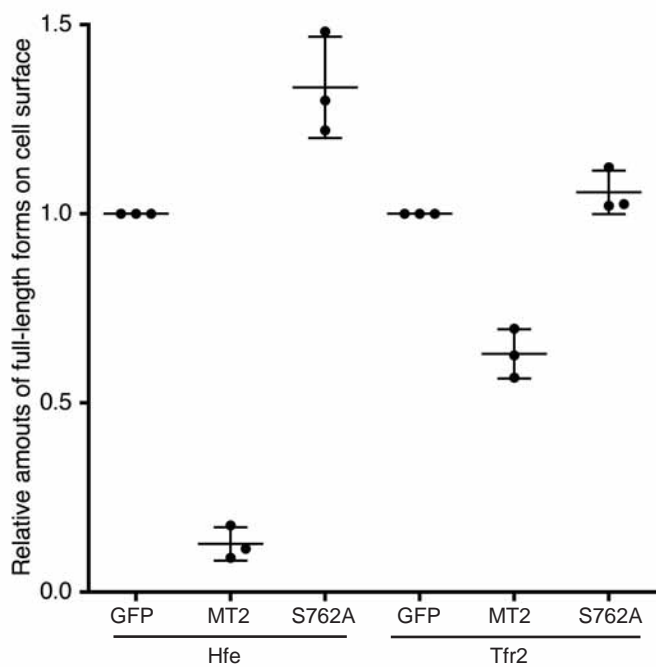

B

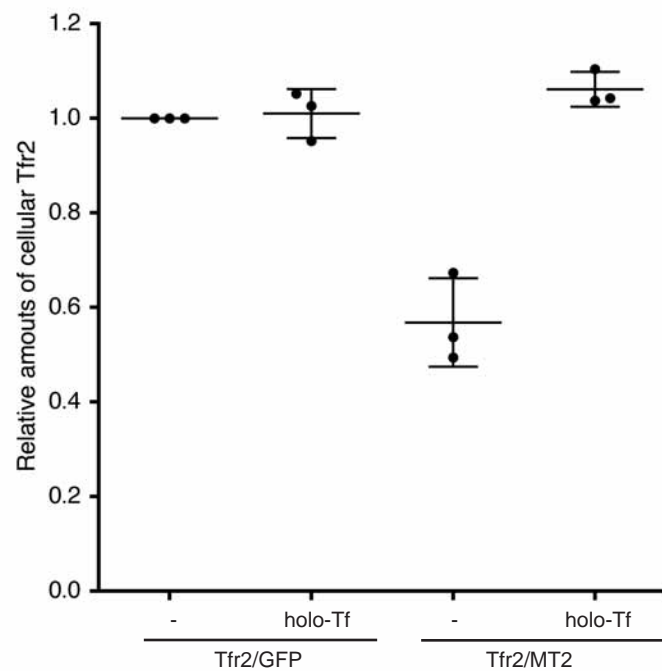

**Supplemental Figure 3. A)** Quantification of biotinylated total cell surface Hfe and Tfr2 in western blot images of Fig. 8B and 8D by using ImageJ software and Licor, respectively, from three independent biological replicates for each. For the convenience of analysis, the band intensities of Hfe and Tfr2 with co-transfection of EGFP (GFP) were arbitrarily set to 1. The relative levels with co-transfection of MT2 and S762A-MT2 (S762A) were presented. **B)** Quantification of Tfr2 band intensities in Fig. 9A by Licor from three independent biological replicates. For the convenience of analysis, the Tfr2 band intensities with co-transfection of EGFP (GFP) and no pre-incubation with holo-Tf were arbitrarily set to 1.

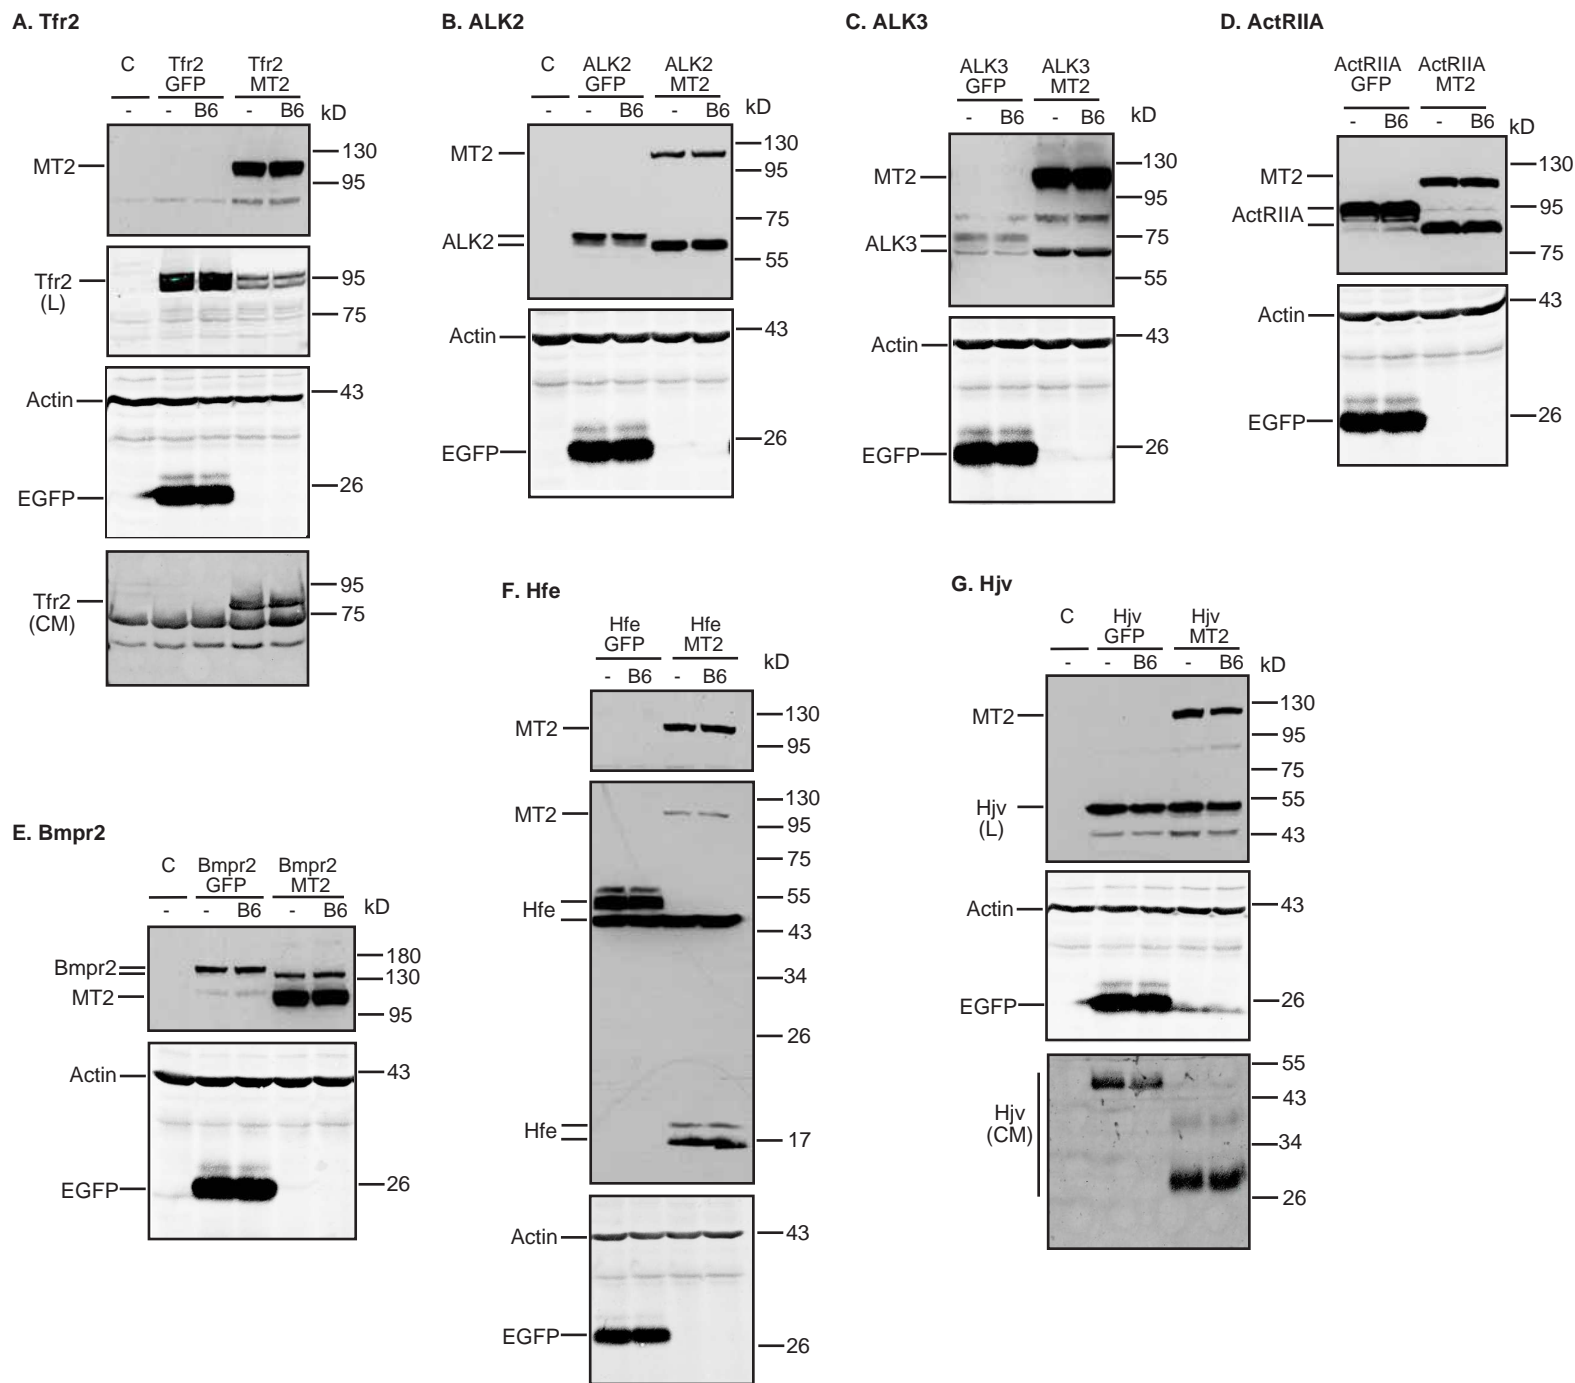

**Supplemental Figure 4. Lack of BMP6 effect on MT2 cleavage of Tfr2 (A), ALK2 (B), ALK3 (C), ActRIIA (D), Bmpr2 (E), Hfe (F), or Hvj (G).** pcDNA3-Tfr2, pCMV6-ALK2, ALK3, ActRIIA, Bmpr2, or Hfe/B2m, or pCMV9-Hvj was co-transfected with an equal amount of pEGFP-N1 or pCMV6-MT2. At 24 hr post-transfection, medium was changed to Opti-MEM with or without BMP6 at 25 ng/ml. After another 24 hr of incubation, cell lysate was collected for immunodetection of MT2, ALK2, ALK3, ActRIIA, Bmpr2, Hfe, and Hvj by using an anti-FLAG antibody, and Tfr2 and beta-actin by using specific antibodies. Additionally, Tfr2 and Hvj in the conditioned medium (CM) were also immunodetected by using anti-Tfr2 and HJV antibodies. All experiments were repeated three times (technical replicate = 1; independent biological replicates = 3) with consistent results.
